# Supplementary material for: CRISPR/Cas12a technology combined with immunochromatographic strips for portable detection of African swine fever virus
Source: PubMed Central journal article supplement (PMC7012833; doi:10.1038/s42003-020-0796-5), 2020-02-11
Supplement: 42003_2020_796_MOESM3_ESM.pdf [file 42003_2020_796_MOESM3_ESM.pdf]

## Supplementary Figures

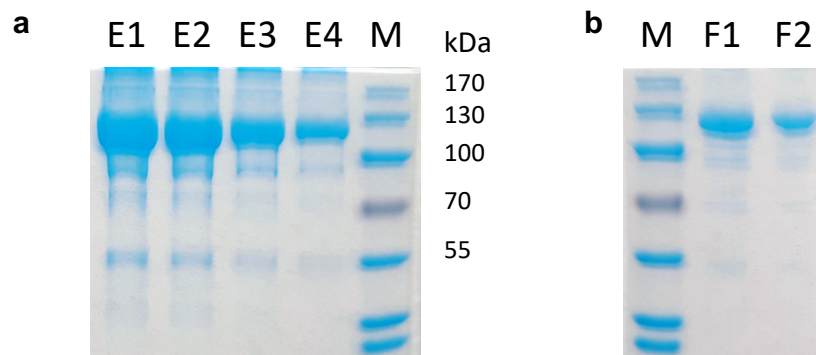

**Supplementary Figure 1.** Purification of LbCas12a protein. SDS-PAGE gel of all LbCas12 samples purified using Ni-NTA resin (**a**) and FPLC (**b**).

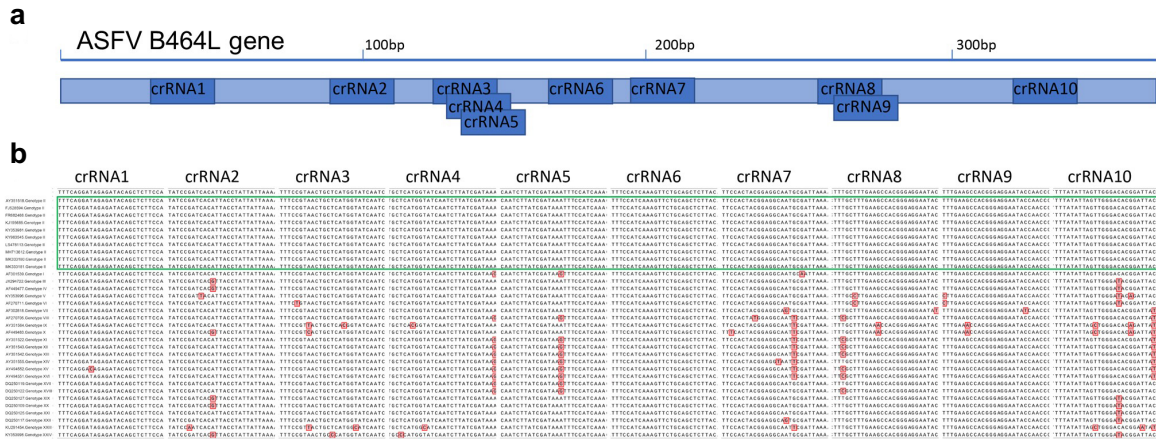

**Supplementary Figure 2.** Design of specific crRNAs for ASFV detection targeting B646L gene. **(a)** Ten crRNAs targeting B646L gene selected for ASFV detection. **(b)** Sequence alignment of B646L genes from 24 ASFV genotypes targeted by crRNAs. The nucleotide variants from the consensus sequence were highlighted with red color.

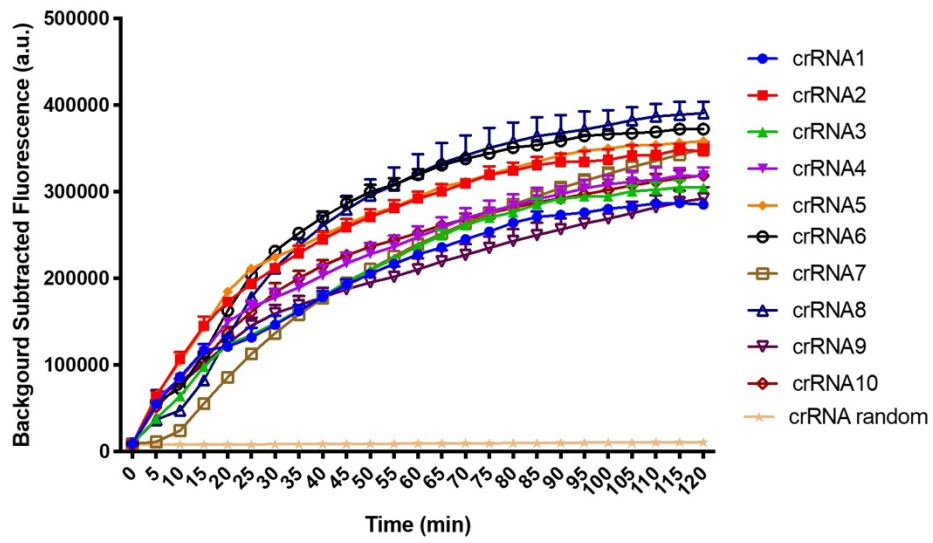

**Supplementary Figure 3.** Time course of ten crRNAs induced CRISPR/Cas12a reaction with ASFV B646L gene.

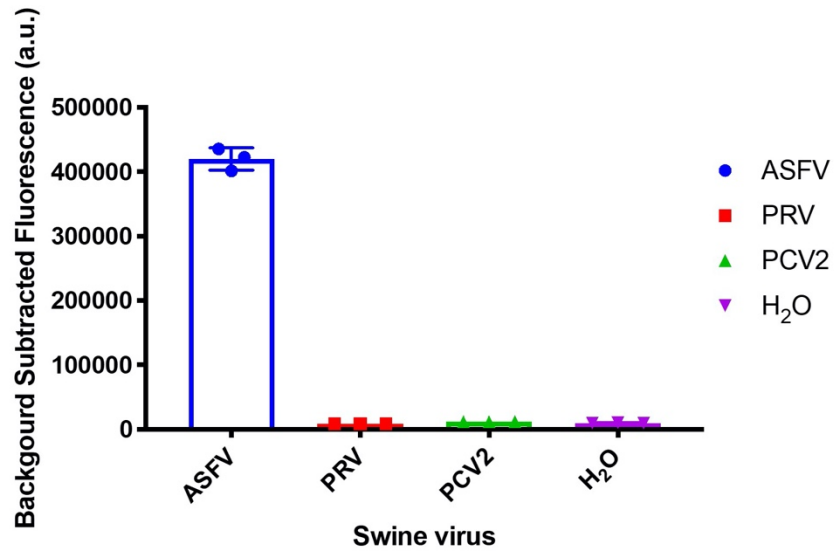

Supplementary Figure 4. Specificity of CRISPR/Cas12a detection of ASFV.

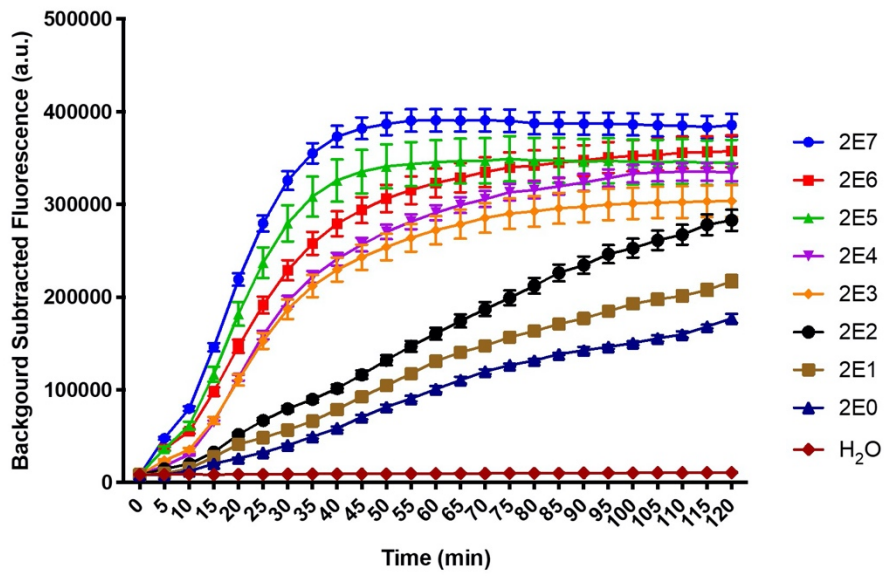

**Supplementary Figure 5.** Sensitivity of CRISPR/Cas12a detection of ASFV B646L gene combined with RAA application in 2-hour time course.

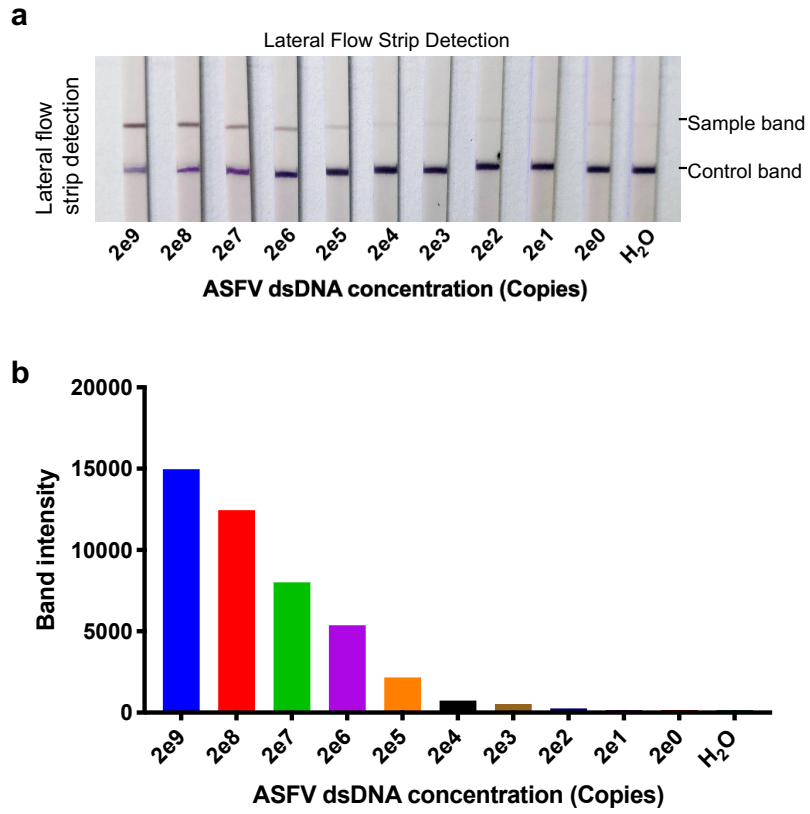

**Supplementary Figure 6.** Sensitivity of ASFV detection by CRISPR-Cas12a lateral flow detection. **(a)** Sensitivity of CRISPR/Cas12a-LFD detection of the synthetic ASFV DNA. **(b)** Quantitation of band intensity from detection in **(a)**.

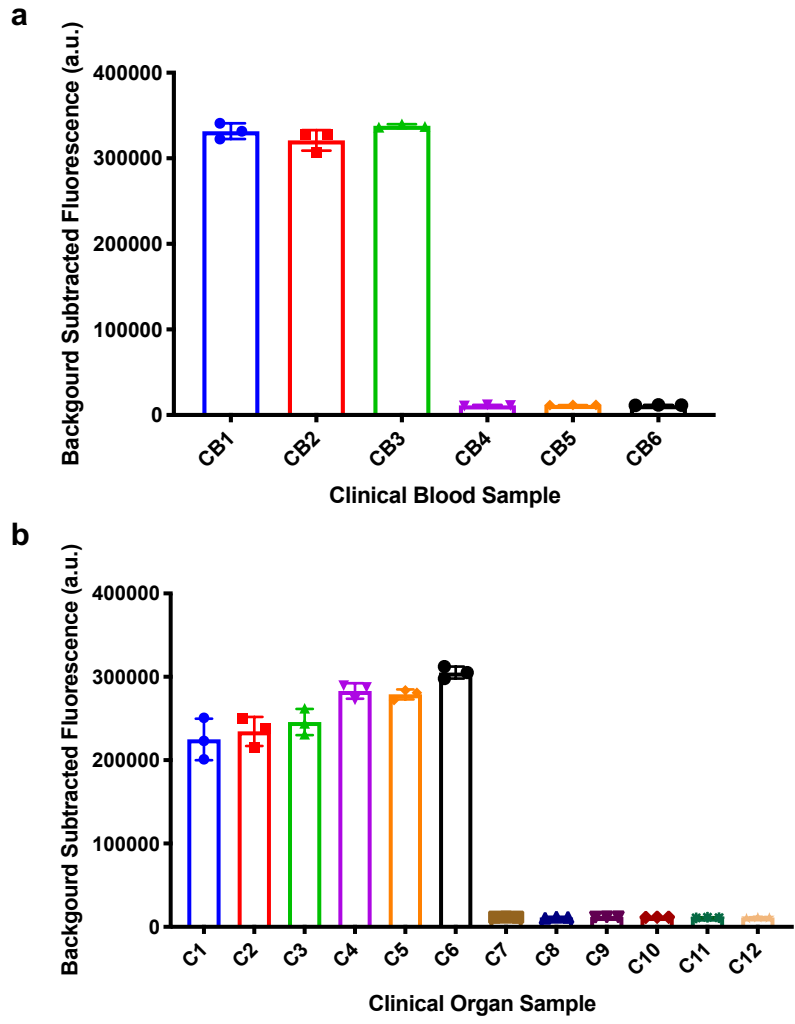

**Supplementary Figure 7.** Detection of ASFV DNA in clinical blood samples (a) and organ samples (b) with CRISPR-Cas12a fluorescence assay.

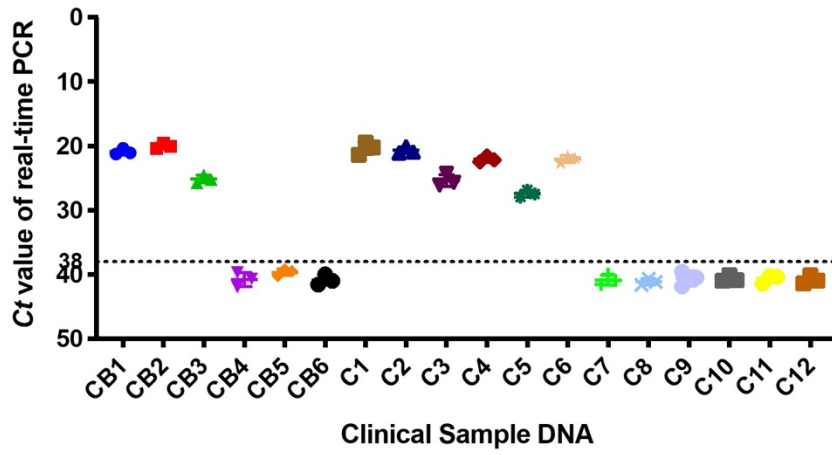

**Supplementary Figure 8.** Detection of ASFV DNA in clinical blood samples and organ samples by Real-time PCR. When Ct value below 38, the sample is ASFV positive.



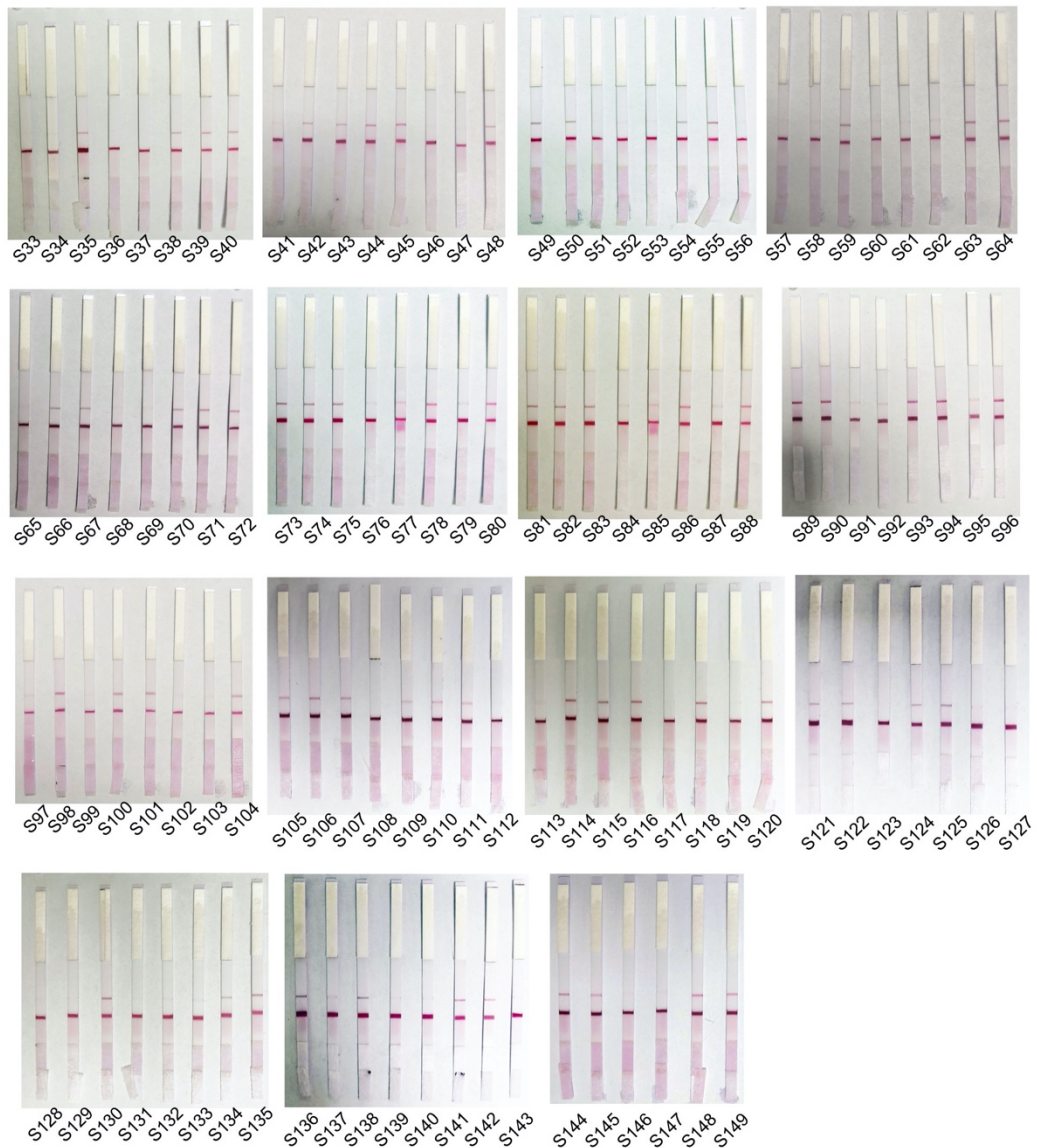

**Supplementary Figure 9.** Detection of ASFV DNA in 117 blood samples using CRISPR/Cas12a-LFD. The sample band and control band on the lateral strip were marked with arrows.

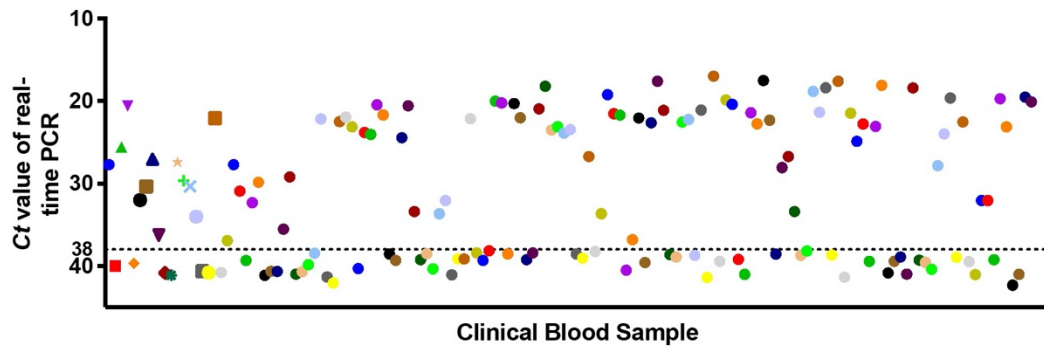

**Supplementary Figure 10.** Detection of ASFV DNA in 149 blood samples by Real-time PCR.

When Ct value below 38, the sample is ASFV positive.

## Supplementary Tables

**Supplementary Table 1.** Primers used in this study

| <b>Primer name</b> | <b>Primer sequence (5' to 3')</b>  |
|--------------------|------------------------------------|
| cLbCas12a-F1       | TACCATGGGTCCGAAAAAGAAACGC          |
| cLbCas12a-R1       | TTAGCAGCCGGATCTCAGTGGTGGT          |
| LB-sgRNA-T7-IVF-F1 | ACGGGAGGTACTTGGAGCGG               |
| LB-sgRNA-T7-IVF-R1 | TAGTGAGACGTGCGGCTTCCGTTT           |
| p72-RAA-F1         | TATGCAGCCCCTCACCACGCAGAGATAAG      |
| p72-RAA-R1         | CCGTTCTGAAGAAGAAGAAGCCGTAGTGATAGAC |
| ASFV-p72-F1        | GATTGGCACAAGTTCGGACATGTT           |
| ASFV-p72-R1        | TTAGGTACTGTAACGCAGCACAGC           |
| crRNA1-F1          | AGATAGGATAGAGATACAGCTCTTCCA        |
| crRNA1-R1          | AAAATGGAAGAGCTGTATCTCTATCCT        |
| crRNA2-F1          | AGATATAATAGGTAATGTGATCGGATA        |
| crRNA2-R1          | AAAATATCCGATCACATTACCTATTAT        |
| crRNA3-F1          | AGATCGTAACTGCTCATGGTATCAATC        |
| crRNA3-R1          | AAAAGATTGATACCATGAGCAGTTACG        |
| crRNA4-F1          | AGATTCGATAAGATTGATACCATGAGC        |
| crRNA4-R1          | AAAAGCTCATGGTATCAATCTTATCGA        |
| crRNA5-F1          | AGATATGGAAATTTATCGATAAGATTG        |
| crRNA5-R1          | AAAAATGGAAATTTATCGATAAGATTG        |
| crRNA6-F1          | AGATCATCAAAGTTCTGCAGCTCTTAC        |
| crRNA6-R1          | AAAAGTAAGAGCTGCAGAACTTTGATG        |
| crRNA7-F1          | AGATATCGCATTGCCTCCGTAGTGGAA        |
| crRNA7-R1          | AAAATTCCACTACGGAGGCAATGCGAT        |
| crRNA8-F1          | AGATCTTTGAAGCCACGGGAGGAATAC        |
| crRNA8-R1          | AAAAGTATTCCTCCCGTGGCTTCAAAG        |
| crRNA9-F1          | AGATAAGCCACGGGAGGAATACCAACC        |
| crRNA9-R1          | AAAAGGTTGGTATTCCTCCCGTGGCTT        |
| crRNA10-F1         | AGATTATTAGTTGGGACACGGATTACG        |
| crRNA10-R1         | AAAACGTAATCCGTGTCCCAACTAATA        |

**Supplementary Table 2.** crRNAs targeting ASFV B646L gene

| <b>crRNA name</b> | <b>crRNA sequence with PAM (5' to 3')</b> | <b>Direction</b> |
|-------------------|-------------------------------------------|------------------|
| crRNA1            | <i>TTTCAGGATAGAGATACAGCTCTTCCA</i>        | +                |
| crRNA2            | <i>TTTAATAATAGGTAATGTGATCGGATA</i>        | -                |
| crRNA3            | <i>TTCCGTAAGTCTCATGGTATCAATC</i>          | +                |
| crRNA4            | <i>TTATCGATAAGATTGATACCATGAGC</i>         | -                |
| crRNA5            | <i>TTGATGGAAATTTATCGATAAGATTG</i>         | -                |
| crRNA6            | <i>TTCCATCAAAGTTCTGCAGCTCTTAC</i>         | +                |
| crRNA7            | <i>TTAATCGCATTGCCTCCGTAGTGGAA</i>         | -                |
| crRNA8            | <i>TTGCTTTGAAGCCACGGGAGGAATAC</i>         | +                |
| crRNA9            | <i>TTGAAGCCACGGGAGGAATACCAACC</i>         | +                |
| crRNA10           | <i>TTATATTAGTTGGGACACGGATTACG</i>         | +                |

Note: The PAM of CRISPR/Cas12a recognize in *italic*.
